# Supplementary material
Source: HighWire-hosted journal article supplement (http://www.cmaj.ca/highwire/filestream/60105/field_highwire_adjunct_files/1/161119-res-2-at.pdf)

**Appendix 2 (as supplied by the authors):** Average annual proportion of Fair PharmaCare enrollees who had any claim where the public plan paid a portion between 2003 and 2015, by year of birth. The discontinuity at the change in deductibles at 1939 led to a drop of 0.29 in the proportion receiving any public drug plan benefits (95%CI: 0.30 to 0.27), a relative drop of 36.3%.

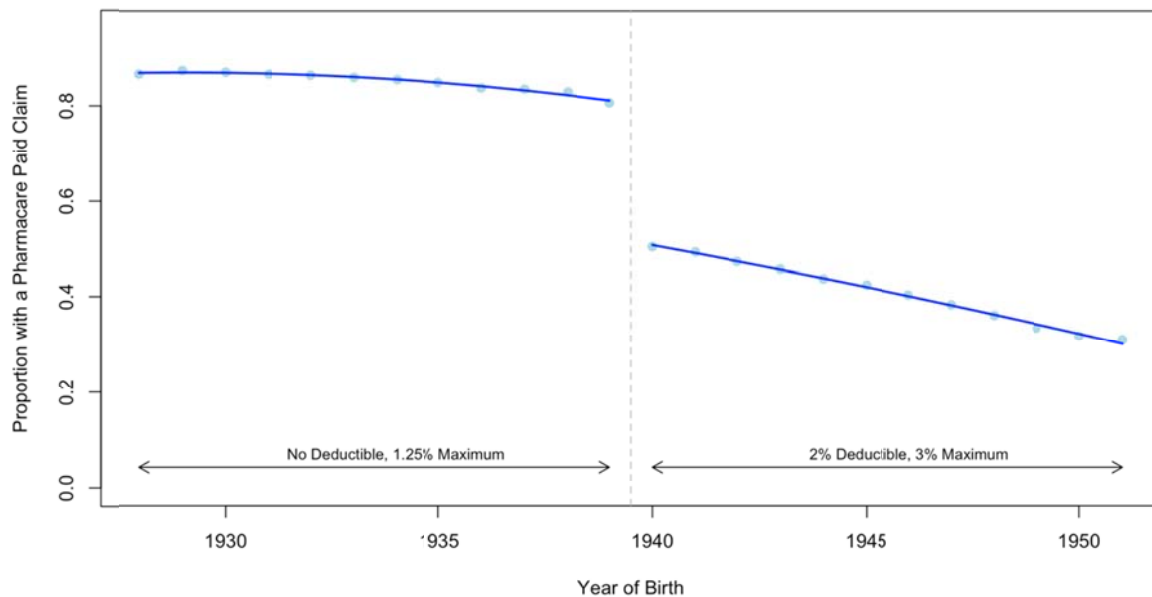

Supplement: 161119-res-2-at.pdf [file 161119-res-2-at.pdf]
